# Supplementary material
Source: Springer Nature journal article supplement (https://www.springermedizin.de/resource/supplementary/13046_2008_91_MOESM5_ESM.pdf/9661684)

### M14

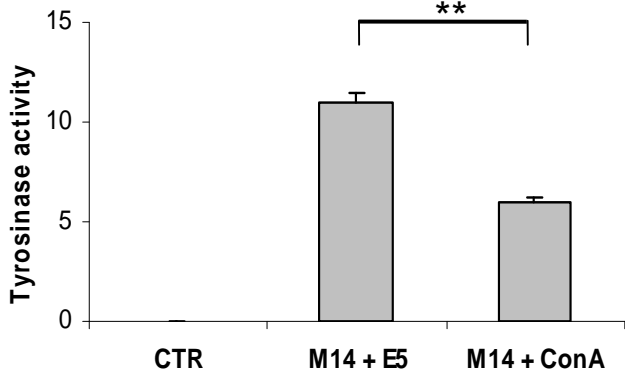

### FRM

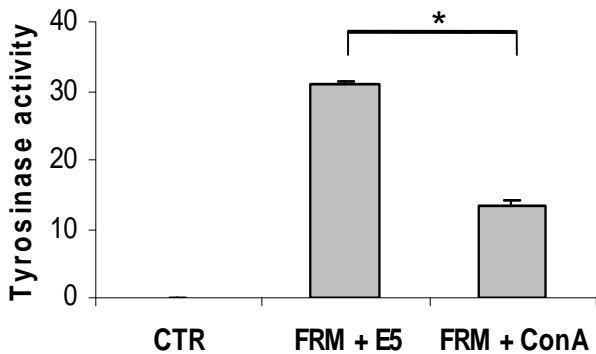

Supplement: MOESM5 [file 9661684]
